# Supplementary material for: Polyelectrolyte complex nanofiltration membranes: performance modulation via casting solution pH
Source: Royal Society of Chemistry journal article supplement (doi:10.1039/c4ra09164g), 2014-01-01
Supplement: c4ra09164g1.pdf [file c4ra09164g1.pdf]

## **Polyelectrolyte complexes nanofiltration membranes: performance modulation via casting solution pH**

Qiang Zhao<sup>a</sup>, Yan-Li Ji<sup>a</sup>, Jia-Kai Wu<sup>a</sup>, Ling-Ling Shao<sup>a</sup>, Quan-Fu An<sup>\*a</sup>, Cong-Jie Gao<sup>b,c</sup>

<sup>a</sup> MOE Key Laboratory of Macromolecular Synthesis and Functionalization, Department of Polymer Science & Engineering, Zhejiang University, Hangzhou 310027, China.

<sup>b</sup> Department of Chemical Engineering and Bioengineering, Zhejiang University, Hangzhou 310027, China

<sup>c</sup> The Development Center of Water Treatment Technology, Hangzhou 310012, China

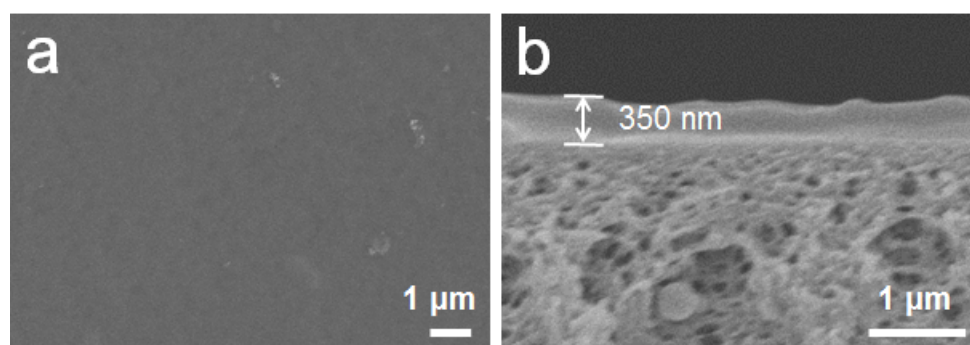

Fig. S1 (a) surface and (b) cross-sectional morphologies of a PECNFM2.1 membrane after 18 h continuous NF test.
